# Supplementary material for: Preparation and Evaluation of Amorphous Solid Dispersions for Enhancing Luteolin’s Solubility in Simulated Saliva
Source: MDPI journal article supplement (doi:10.3390/polym15010169), 2022-12-29
Supplement: s1 [file s1]

## Supplementary Materials

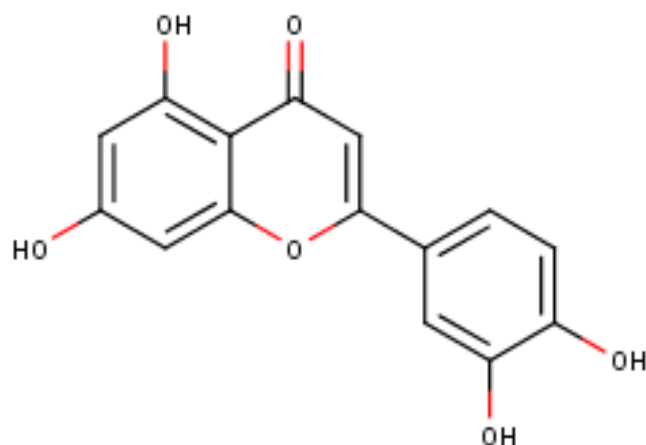

Figure S1. Structural formula of LUT.

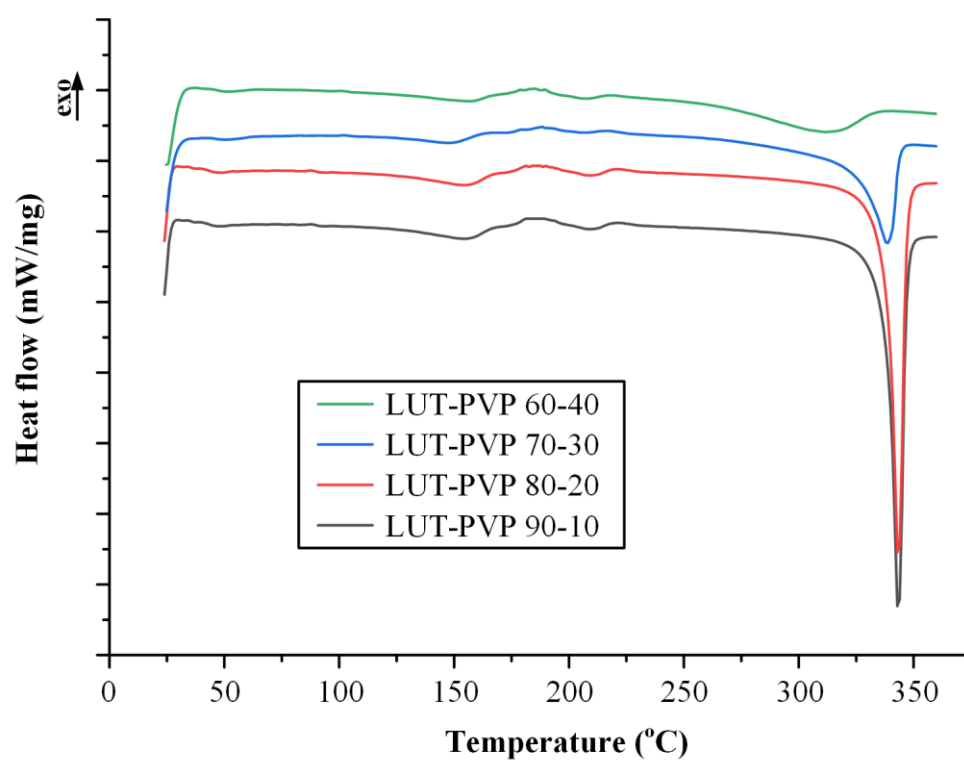

Figure S2. DSC thermograms of LUT-PVP binary mixtures (1<sup>st</sup> heating scan), used for the determination of FH parameter ( $\chi$ ).

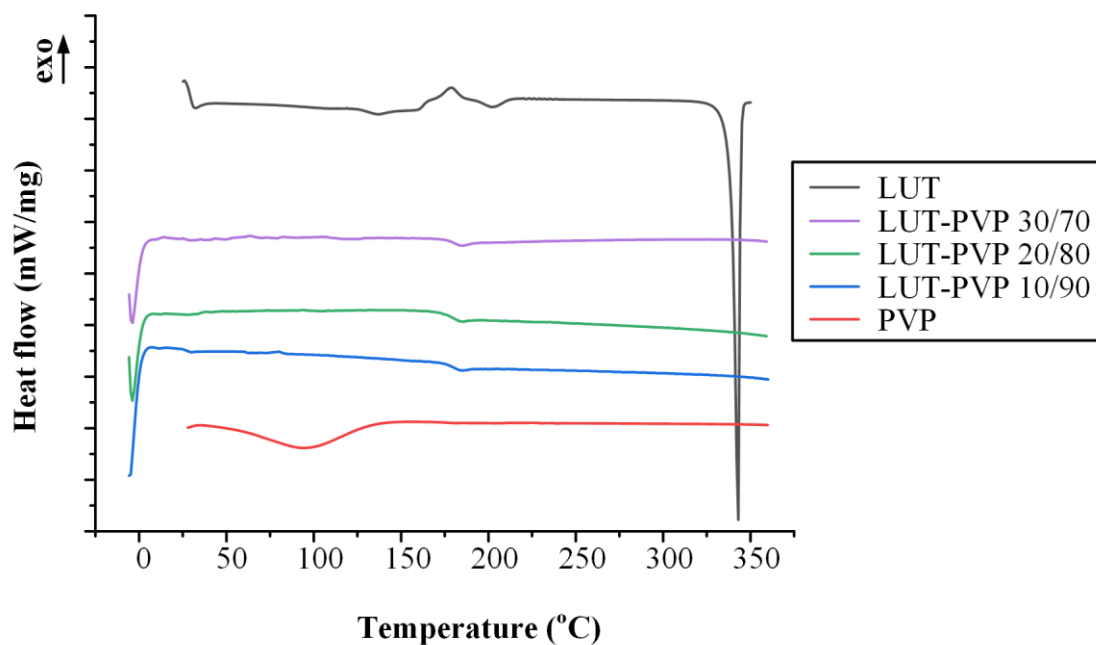

**Figure S3.** DSC thermograms of neat LUT, near PVP and LUT-PVP ASDs at weight ratios of 10, 20 and 30 % w/w of LUT to PVP.

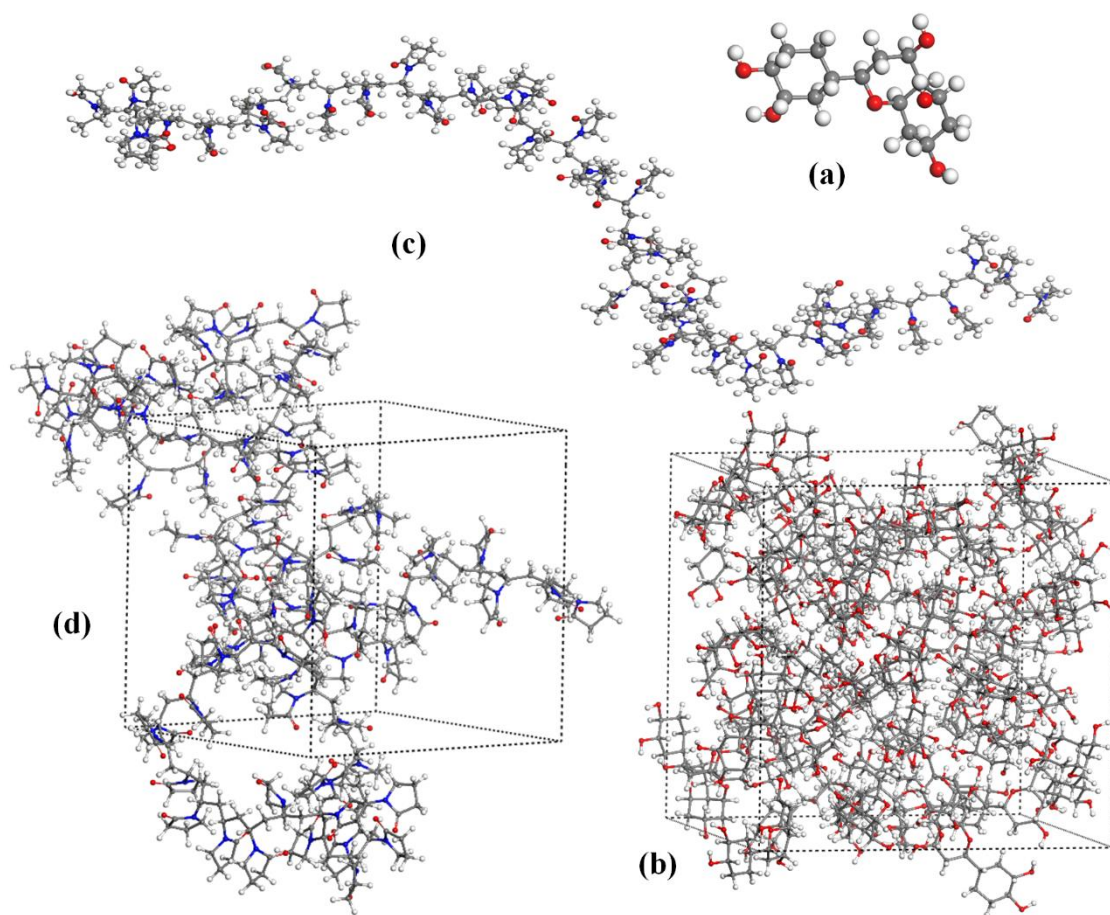

**Figure S4.** Chemical structures of LUT (a), MD-simulation box containing 20 LUT molecules (b) 20-monomer PVP chain (c), and MD-simulation box containing two amorphous 20-monomer chains of PVP (d) (hydrogen atoms with white, carbon atoms with grey, oxygen atoms with red and nitrogen atoms with blue).

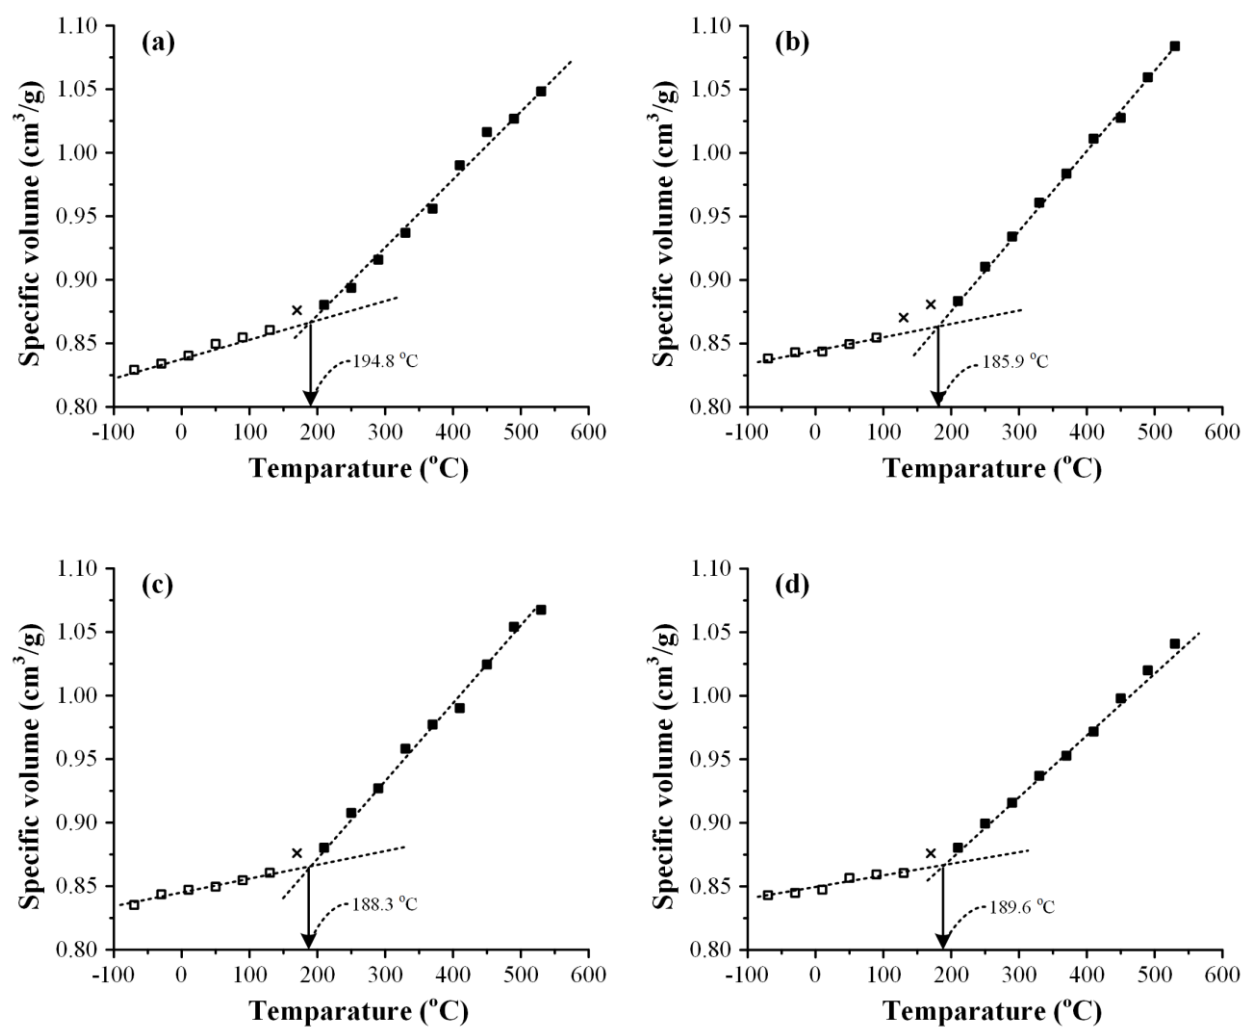

**Figure S5.** Specific volume ( $v$ ) *vs.* temperature for neat LUT (a) and LUT-PVP 10% (b), 20% (c) and 30% (d) w/w LUT (values corresponding to the glassy state are depicted with -  $\square$  - and the rubbery state with -  $\blacksquare$  -). Values that were not used in the analysis were shown with -  $\times$  -).
